# Supplementary material for: Identification of regulatory structure and kinetic parameters of biochemical networks via mixed-integer dynamic optimization
Source: Springer Nature journal article supplement (doi:10.1186/1752-0509-7-113), 2013-01-01

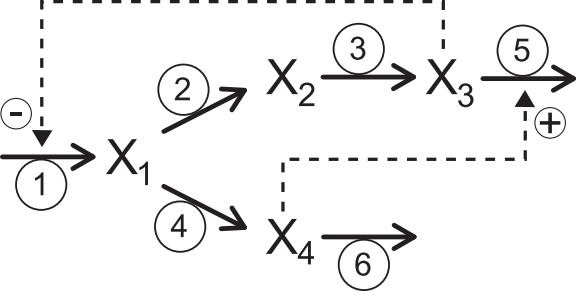

Supplement: 12918_2013_1446_MOESM2_ESM.pdf [file 12918_2013_1446_MOESM2_ESM.pdf]
